# Supplementary material for: Determinants of adherence to daily PrEP measured as intracellular tenofovir diphosphate concentrations over 24 months of follow-up among men who have sex with men
Source: HighWire-hosted journal article supplement (doi:10.1136/sextrans-2022-055499), 2022-09-05
Supplement: sextrans-2022-055499supp001_data_supplement.pdf [file sextrans-2022-055499supp001_data_supplement.pdf]

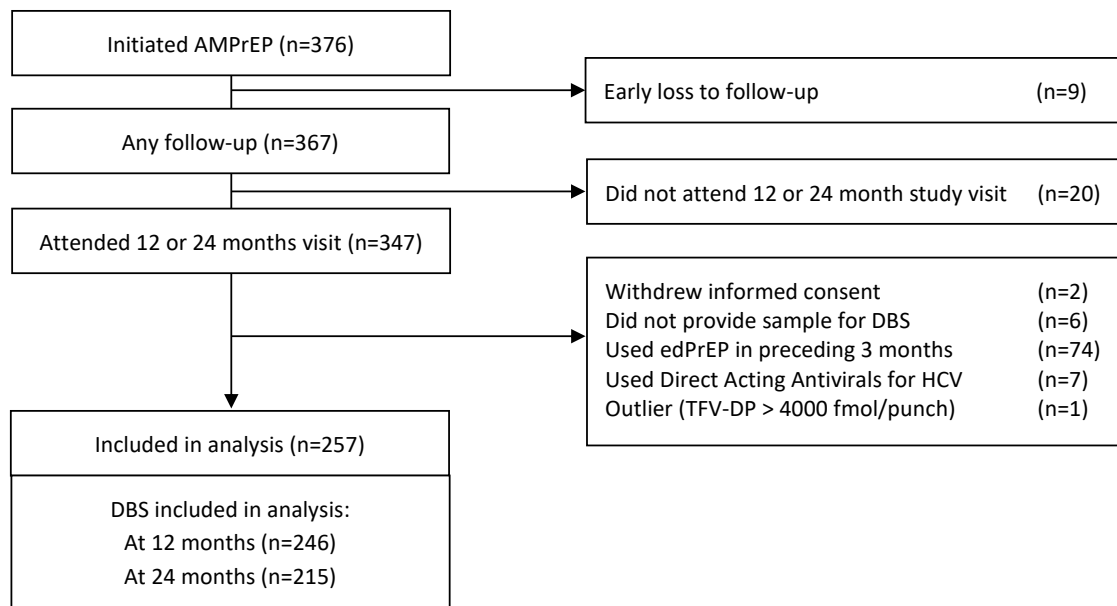

**Supplementary Figure:** Flow diagram of AMPrEP study participants included in analysis and reasons for exclusion. AMPrEP, Amsterdam, 2015-2018.

AMPrEP: Amsterdam PrEP demonstration project; DBS: dried blood spots; edPrEP: event-driven PrEP; HCV: hepatitis C virus infection; TFV-DP: tenofovir diphosphate concentration in DBS.
