# Supplementary material for: Determinants of adherence to daily PrEP measured as intracellular tenofovir diphosphate concentrations over 24 months of follow-up among men who have sex with men
Source: HighWire-hosted journal article supplement (doi:10.1136/sextrans-2022-055499), 2022-09-05
Supplement: sextrans-2022-055499supp002_data_supplement.pdf [file sextrans-2022-055499supp002_data_supplement.pdf]

**Supplementary Table:** Behavioural and psychosocial characteristics and baseline demographic variables of users of daily oral PrEP (emtricitabine/tenofovir disoproxil), associated with TFV-DP concentration in linear regression analysis using generalised estimating equations. Sensitivity analysis excluding visits on which participants switched to event-driven PrEP (n=250; total number of DBS samples=440). AMPrEP study, Amsterdam, 2015-2018.

|                                                                                              | Univariable |                 |         | Multivariable |                 |         |
|----------------------------------------------------------------------------------------------|-------------|-----------------|---------|---------------|-----------------|---------|
|                                                                                              | $\beta^a$   | (95% CI)        | p value | $\beta^a$     | (95% CI)        | p value |
| <b>Demographic characteristics</b>                                                           |             |                 |         |               |                 |         |
| Age (modelled as cubic spline; ref.: 21 years)                                               |             |                 | 0.0063  |               |                 | 0.0014  |
| 35 years                                                                                     | 35.4        | (-248 to 319)   |         | 29.7          | (-260 to 319)   |         |
| 50 years                                                                                     | 21.8        | (-228 to 271)   |         | 28.5          | (-226 to 283)   |         |
| 55 years                                                                                     | 131         | (-120 to 382)   |         | 144           | (-110 to 399)   |         |
| 60 years                                                                                     | 288         | (1.06 to 576)   |         | 308           | (21.5 to 595)   |         |
| 65 years                                                                                     | 469         | (107 to 832)    |         | 496           | (141 to 852)    |         |
| Self-declared ethnicity: non-white                                                           | -88.6       | (-253 to 76.0)  | 0.29    |               |                 |         |
| Place of residency in the Netherlands: outside Amsterdam                                     | -31.4       | (-159 to 96.3)  | 0.63    |               |                 |         |
| Education level                                                                              |             |                 |         |               |                 |         |
| Low, middle, other                                                                           | 0           |                 | 0.74    |               |                 |         |
| High                                                                                         | -24.1       | (-166 to 118)   |         |               |                 |         |
| Employment <sup>b</sup>                                                                      |             |                 |         |               |                 |         |
| Employed                                                                                     | 0           |                 | 0.30    |               |                 |         |
| Unemployed                                                                                   | -123        | (-462 to 216)   |         |               |                 |         |
| Other (retired, volunteer, disabled, student)                                                | 129         | (-61.8 to 320)  |         |               |                 |         |
| Net monthly income in Euro's <sup>c</sup>                                                    |             |                 |         |               |                 |         |
| ≤1700                                                                                        | 0           |                 | 0.97    |               |                 |         |
| 1701-2950                                                                                    | 44.0        | (-117 to 205)   |         |               |                 |         |
| >2950                                                                                        | 39.5        | (-132 to 211)   |         |               |                 |         |
| Living situation                                                                             |             |                 |         |               |                 |         |
| Alone                                                                                        | 0           |                 | 0.029   |               |                 |         |
| With partner                                                                                 | 29.8        | (-95.8 to 155)  |         |               |                 |         |
| With parents/flatmates                                                                       | -202        | (-376 to -28.9) |         |               |                 |         |
| Steady relationship <sup>d</sup>                                                             | -17.6       | (-136 to 101)   | 0.77    |               |                 |         |
| Sexual preference: not exclusively homosexual <sup>e</sup>                                   | 161         | (14.5 to 308)   | 0.031   |               |                 |         |
| <b>Sexual behaviour (past 3 months)</b>                                                      |             |                 |         |               |                 |         |
| Any sexually transmitted infection <sup>f</sup>                                              | -32.3       | (-136 to 71.2)  | 0.54    |               |                 |         |
| Total number of sex partners (log transformed) <sup>g</sup>                                  | 40.1        | (-9.92 to 90.1) | 0.12    |               |                 |         |
| Total number of condomless anal sex acts with casual partners (log transformed) <sup>h</sup> | 25.3        | (-16.1 to 66.7) | 0.23    |               |                 |         |
| Condomless anal sex with a casual partner (6 months prior to inclusion in AMPrEP)            | 191         | (48.4 to 333)   | 0.0086  | 183           | (50.5 to 315)   | 0.0068  |
| <b>Mental health characteristics and drug use</b>                                            |             |                 |         |               |                 |         |
| Score ≥24 on Sexual compulsivity scale <sup>g</sup> (indication of sexual compulsivity)      | -46.9       | (-173 to 79.3)  | 0.47    |               |                 |         |
| Chemsex <sup>h,i</sup>                                                                       | -5.53       | (-105 to 93.6)  | 0.91    |               |                 |         |
| MHI-5 score <60 <sup>g,j</sup>                                                               | -52.3       | (-186 to 81.4)  | 0.44    |               |                 |         |
| Score ≥8 on Alcohol use disorder identification test (AUDIT) <sup>k</sup>                    | -49.2       | (-171 to 73.0)  | 0.43    |               |                 |         |
| Score ≥8 on Drug use disorder identification test (DUDIT) <sup>l</sup>                       | -42.7       | (-152 to 66.9)  | 0.58    |               |                 |         |
| Neutral to high concern about acquiring HIV <sup>m</sup>                                     | 104         | (-70.3 to 278)  | 0.24    |               |                 |         |
| Very important to prevent HIV <sup>m</sup>                                                   | 83.2        | (-51.9 to 218)  | 0.23    |               |                 |         |
| <b>Access to mobile application</b>                                                          |             |                 |         |               |                 |         |
| Extended app                                                                                 | 126         | (2.01 to 251)   | 0.046   | 136           | (18.5 to 253)   | 0.023   |
| <b>AMPrEP study visit</b>                                                                    |             |                 |         |               |                 |         |
| 24 months vs. 12 months                                                                      | -67.7       | (-131 to -4.77) | 0.035   | -76.1         | (-139 to -13.4) | 0.018   |

AMPrEP: Amsterdam PrEP demonstration project; DBS: dried blood spots; MHI-5: Mental Health Inventory-5; PrEP: pre-exposure prophylaxis; TFV-DP: tenofovir diphosphate.

<sup>a</sup> TFV-DP concentration in DBS in fmol/punch; <sup>b</sup> 6 missing; <sup>c</sup> 27 missing; <sup>d</sup> 5 missing; <sup>e</sup> 2 missing; <sup>f</sup> 4 missing; <sup>g</sup> 14 missing; <sup>h</sup> 16 missing; <sup>i</sup> Use of  $\gamma$ -hydroxybutyrate,  $\gamma$ -Butyrolactone, methamphetamine or mephedrone prior to or during sex in the 3 months prior to inclusion into AMPrEP; <sup>j</sup> Indication of an anxiety or depressive mood disorder; <sup>k</sup> Indication of an alcohol use disorder, 15 missing; <sup>l</sup> Indication of a drug use disorder, 15 missing; <sup>m</sup> Scale 1-7, dichotomised, at baseline.
